# Supplementary material for: The Polycyclic Aromatic Hydrocarbon (PAH) degradation activities and genome analysis of a novel strain Stenotrophomonas sp. Pemsol isolated from Mexico
Source: PeerJ. 2020 Jan 6;8:e8102. doi: 10.7717/peerj.8102 (PMC6951288; doi:10.7717/peerj.8102)
Supplement: Supplemental Information 4 — COGs category comparison betwen Pemsol and and five other PAH degrading bacteria [file peerj-08-8102-s004.xls]

Feature	Description	Mean Stenopemsol(n=1)	Mean stenotrophomonasselected(n=13)	StdErr Stenopemsol(n=1)	StdErr stenotrophomonasselected(n=13)	FishersTest Pval	FishersTest adjPval
X	Mobilome: prophages, transposons	0.419761059089441	0.923942955392114	NA	0.173965574295029	0.00201782970491402	0.0363209346884524
B	Chromatin structure and dynamics	0.0322893122376493	0.0269903604018861	NA	0.00335359134925132	0.602093880437182	0.954509377126045
C	Energy production and conversion	6.00581207620278	5.97161223459377	NA	0.0373514388382973	0.954509377126045	0.954509377126045
E	Amino acid transport and metabolism	6.78075556990636	6.74428573223878	NA	0.0630701280717096	0.927524572252368	0.954509377126045
F	Nucleotide transport and metabolism	2.32483048111075	2.19798825325681	NA	0.0594914458201768	0.566366877919029	0.954509377126045
G	Carbohydrate transport and metabolism	4.55279302550856	4.5897549652534	NA	0.138974640143872	0.934235691196804	0.954509377126045
H	Coenzyme transport and metabolism	4.81110752340975	4.69631015092218	NA	0.0593127160880702	0.793264845089331	0.954509377126045
I	Lipid transport and metabolism	4.29447852760736	4.44784497697082	NA	0.0525550148016705	0.748556075953312	0.954509377126045
L	Replication, recombination and repair	3.26122053600258	3.44570662755168	NA	0.0913649710232152	0.660952651100988	0.954509377126045
N	Cell motility	3.74556021956732	3.63272081721937	NA	0.0651391644052643	0.741288358917233	0.954509377126045
P	Inorganic ion transport and metabolism	5.61834032935098	5.84836549357685	NA	0.0898794502230029	0.649696041771689	0.954509377126045
Q	Secondary metabolites biosynthesis, transport and catabolism	2.58314497901195	2.45530493059612	NA	0.0818196411572396	0.674725600523052	0.954509377126045
R	General function prediction only	8.42751049402648	8.31388730803025	NA	0.148536192403534	0.918475175546631	0.954509377126045
S	Function unknown	6.42557313529222	6.36264147648683	NA	0.0712566627444182	0.897913553434949	0.954509377126045
T	Signal transduction mechanisms	6.52244107200517	6.39707516183633	NA	0.101537089470623	0.84704812919552	0.954509377126045
U	Intracellular trafficking, secretion, and vesicular transport	2.4216984178237	2.49052602602653	NA	0.0902413800732273	0.904363519142737	0.954509377126045
V	Defense mechanisms	3.19664191152728	3.09365987396162	NA	0.0660946415565009	0.788346466275812	0.954509377126045
W	Extracellular structures	1.77591217307071	1.49617934480781	NA	0.0480303320209057	0.252336021881212	0.954509377126045
A	RNA processing and modification	0.0322893122376493	0.0370933462671365	NA	0.00338730824583998	1	1
D	Cell cycle control, cell division, chromosome partitioning	1.06554730384243	1.07579386173488	NA	0.0184860822778253	1	1
J	Translation, ribosomal structure and biogenesis	6.81304488214401	6.92222681304165	NA	0.183622555330103	0.97630705221217	1
K	Transcription	7.3942525024217	7.30877241808783	NA	0.232507913907682	0.999999999999984	1
M	Cell wall/membrane/envelope biogenesis	6.74846625766871	6.72469481852219	NA	0.0780891447091311	0.99999999999988	1
O	Posttranslational modification, protein turnover, chaperones	4.7142395866968	4.76228481863368	NA	0.0621675574598017	0.985101376724581	1
Z	Cytoskeleton	0.0322893122376493	0.0343372345894913	NA	0.00178668763035408	1	1
