# Supplementary material for: The Polycyclic Aromatic Hydrocarbon (PAH) degradation activities and genome analysis of a novel strain Stenotrophomonas sp. Pemsol isolated from Mexico
Source: PeerJ. 2020 Jan 6;8:e8102. doi: 10.7717/peerj.8102 (PMC6951288; doi:10.7717/peerj.8102)
Supplement: Supplemental Information 5 — The table contains the growth of Stenotrophomonas sp. Pemsol in different PAH studies in the 8 days of tolerance studies [file peerj-08-8102-s005.xlsx]

## Sheet: Sheet1
	The growth of pemsol on hydrocarbon supplemented plates
Days	Naphthalene +Bushnell hass medium+ Stenotrophomonas sp. Pemsol	Minimal medium + bacteria	Minimal medium without bacteria
0	400000	148640000	0
1	34000000	50480000	0
2	45360000	35680000	0
3	46160000	36160000	0
4	3.072e+07	43760000	0
5	5.6e+07	6.264e+07	0
8	70960000	51840000	0
Days	Anthracene+Bushnell hass medium+ Stenotrophomonas sp. Pemsol	Minimal medium + bacteria	minimal medium without bacteria
0	20000000	148640000	0
1	106000000	50480000	0
2	149600000	35680000	0
3	162240000	36160000	0
4	287360000	43760000	0
5	361040000	6.264e+07	0
8	453840000	51840000	0
Days	Phenathridine+Bushnell hass medium+ Stenotrophomonas sp. Pemsol	Minimal medium + Pemsol	Minimal medium without bacteria
0	5600000	148640000	0
1	115760000	50480000	0
2	122560000	35680000	0
3	105440000	36160000	0
4	88080000	43760000	0
5	90240000	6.264e+07	0
8	162480000	51840000	0
Days	Anthroquinone+Bushnell hass medium+ Stenotrophomonas sp. Pemsol	Minimal medium + Pemsol	Minimal medium without bacteria
0	117200000	148640000	0
1	2.232e+08	50480000	0
2	200880000	35680000	0
3	203520000	36160000	0
4	280000000	43760000	0
5	236640000	6.264e+07	0
8	382320000	51840000	0
Days	Phenanthrene+Bushnell hass medium+ Stenotrophomonas sp. Pemsol	bushnell medium + Stenotrophomonas sp. Pemsol	Minimal medium without bacteria
0	8000000	148640000	0
1	51120000	50480000	0
2	74400000	35680000	0
3	49840000	36160000	0
4	6.264e+07	43760000	0
5	1.2528e+08	6.264e+07	0
8	62320000	51840000	0
